# Supplementary material for: Synthesis of Dolichols in Candida albicans Is Co-Regulated with Elongation of Fatty Acids
Source: MDPI journal article supplement (doi:10.3390/ijms23010409), 2021-12-30
Supplement: s1 [file s1]

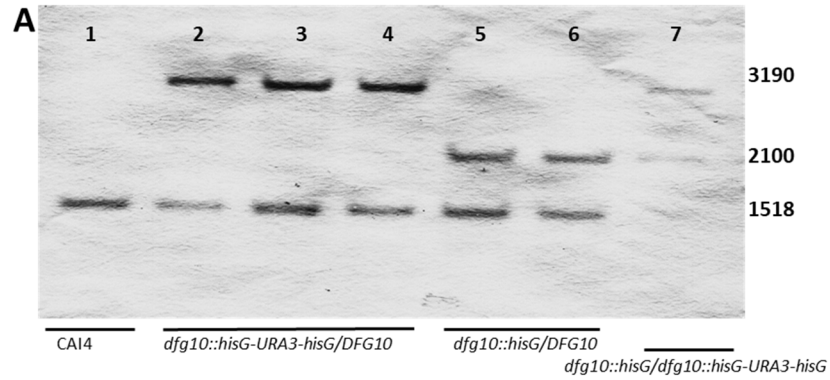

**A1**

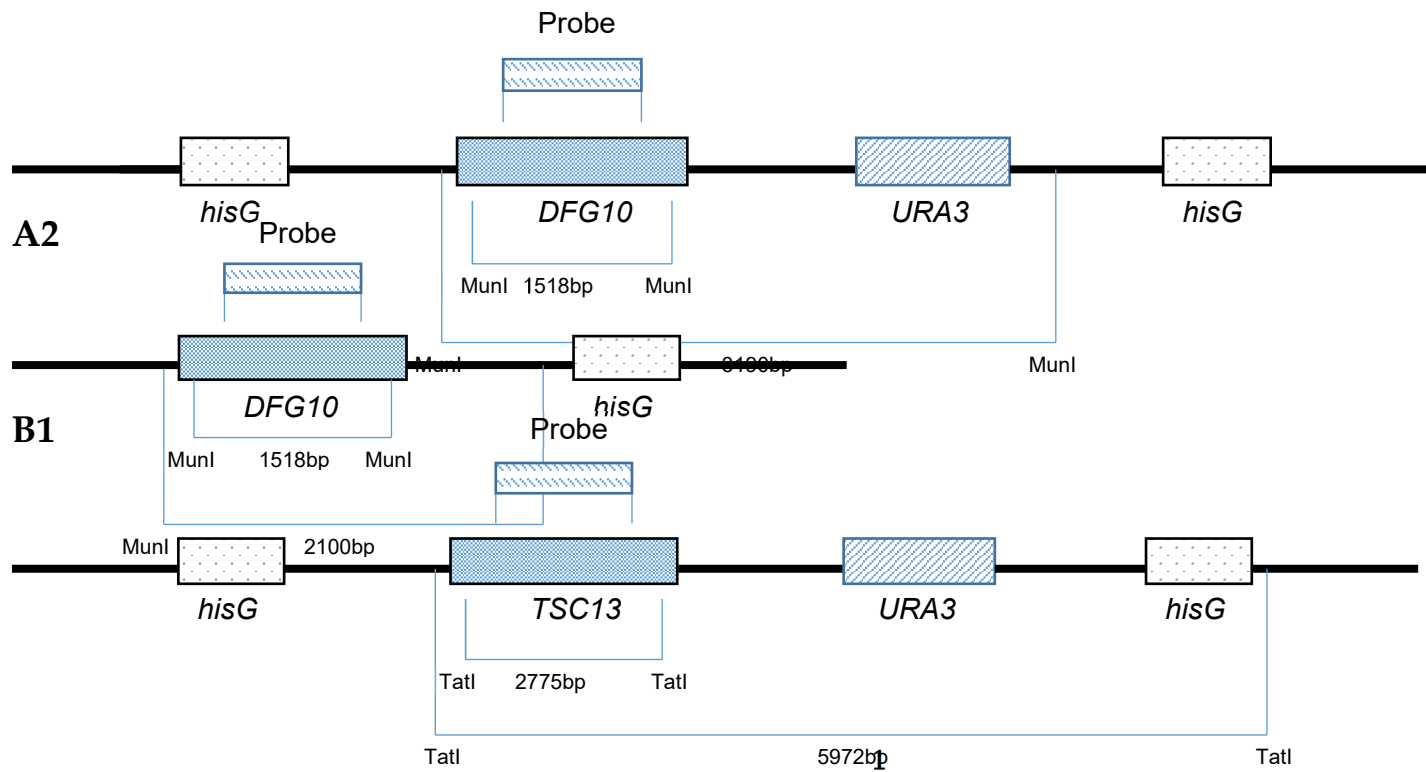

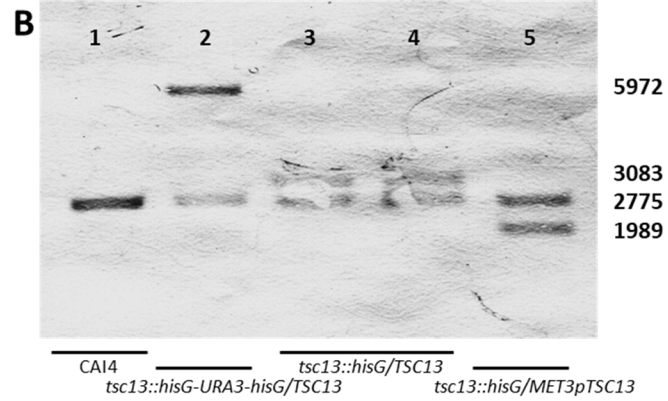

**B2**

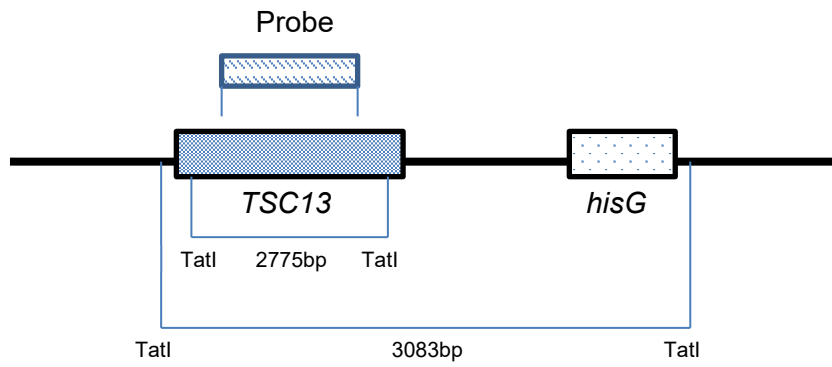

**B3**

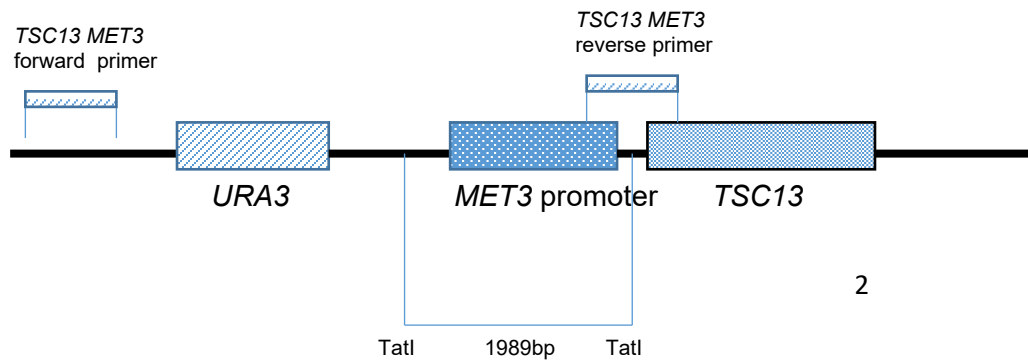

**Figure S1.** Southern analysis of *dfg1Δ0* (A) and *tsc1Δ13* (B) strains of *C. albicans* CAI4.

A- Analysis of *dfg10Δ* strain

MunI-digested DNA of control strain CAI4 (lane1), hemizygote *dfg10::hisG-URA3-hisG/DFG10* before *URA3* excision (lane 2, 3, 4)

hemizygote *dfg10::hisG/DFG10* after *URA3* excision (lane 5, 6), homozygote *dfg10::hisG/dfg10::hisG-URE3-hisG* strain (lane 7)

Blot was probed with digoxigenin-labeled *DFG10* fragment and visualized with NBT/BCIP

A1- restriction map of *DFG10* region before *URA3* excision

A2- restriction map of *DFG10* region after *URA3* excision

B- Analysis of *tsc13Δ*

TatI-digested DNA of control strain CAI4 (lane1), hemizygote *tsc13::hisG-URA3-hisG/TSC13* before *URA3* excision (lane 2), hemizygote

*tsc13::hisG/TSC13* after *URA3* excision, *tsc13::hisG/MET3pTSC13* strain (lane 5).

Blot was probed with digoxigenin-labeled *TSC13* fragment and visualized with NBT/BCIP

B1- restriction map of *TSC13* region before *URA3* excision

B2- restriction map of *TSC13* after *URA3* excision

B3- restriction map of *TSC13* under the regulatable *MET3* promoter

Table S1

Profile of fatty acids in membranes from wild type and mutants of *C. albicans* strains

|                   | CAI4                      | <i>tsc13Δ/MET3pTSC13</i><br>(Met/Cys -) | <i>tsc13Δ/MET3pTSC13</i><br>(Met/Cys +) | <i>dfg10Δ/dfg10Δ-<br/>tsc13Δ/MET3pTSC13</i><br>(Met/Cys -) | <i>dfg10Δ/dfg10Δ-<br/>tsc13Δ/MET3pTSC13</i><br>(Met/Cys +) | <i>dfg10Δ/dfg10Δ</i> |
|-------------------|---------------------------|-----------------------------------------|-----------------------------------------|------------------------------------------------------------|------------------------------------------------------------|----------------------|
| Fatty acid        | Content of fatty acid (%) |                                         |                                         |                                                            |                                                            |                      |
| C14 Miristic      | 0,61±0,03                 | 0,38 ±0,01                              | 1,02 ±0,1                               | 0,60 ±0,02                                                 | 0,83 ±0,04                                                 | 0,52 ±0,04           |
| C16:0 Palmitic    | 19,83 ±0,08               | 18,03 ±0,28                             | 17,08 ±0,52                             | 17,35 ±0,12                                                | 18,09 ±0,17                                                | 16,93 ±0,58          |
| C16:1 Palmitoleic | 17,29 ±0,21               | 14,28 ±0,03                             | 25,02± 1                                | 15,05 ±0,21                                                | 18,21± 0,18                                                | 13,76± 0,66          |
| C17:0 Margaric    | 0,46 ±0,34                | 0,36 ±0,04                              | 0,55 ±0,02                              | 0,75 ±0,01                                                 | 1,29 ±0,03                                                 | 0,46 ±0,04           |
| C17:1 Margarinic  | 1,37 ±0,03                | 0,76 ±0,62                              | 3,00 ±0,07                              | 2,24 ±0,08                                                 | 4,45 ±0,28                                                 | 0,77 ±0,7            |
| C18:0 Stearic     | 4,2± 0,08                 | 4,04± 0,02                              | 2,57± 0,13                              | 3,73± 0,02                                                 | 2,98 ± 0,24                                                | 4,05± 0,16           |
| C18:1 Oleic       | 21,27± 0,13               | 17,44± 0,11                             | 18,12 ± 0,33                            | 19,86± 0,22                                                | 15,68± 0,23                                                | 16,66 ± 1,37         |
| C18:2 Linoleic    | 26,52 ±0,4                | 34,43± 0,06                             | 25,27 ±0,72                             | 26,47± 0,05                                                | 26,30± 1,12                                                | 31,29± 1,03          |
| C18:3 Linolenic   | 7,42 ± 0,09               | 7,88± 0,17                              | 3,11± 0,22                              | 7,26± 0,73                                                 | 5,75± 0,42                                                 | 7,62± 0,17           |

The values shown do not add to 100% because of a variable content of C17 fatty acids [between ca. 1 and 6% of all fatty acids analyzed, not shown].

Table S2 Primers used for mutant construction

| Name      | Sequence                         | Remarks                               |
|-----------|----------------------------------|---------------------------------------|
| DFG10 F1F | <u>GAGCTC</u> TGGCAGCGGGTAGTTTAA | Restriction site for SacI underlined  |
| DFG10 F1R | <u>AGATCT</u> CTACGTAAGTTTTGATGG | Restriction site for BglII underlined |

|             |                                                                                                 |                                       |
|-------------|-------------------------------------------------------------------------------------------------|---------------------------------------|
| DFG10 F2F   | <u>GGATCC</u> GCTATGGCAAAAGAGCAA                                                                | Restriction site for BamHI underlined |
| DFG10 F2R   | <u>CTGCAG</u> TCGCACTGTTATAGGGCA                                                                | Restriction site for PstI underlined  |
| FverDFG10   | CATAGTTTGTATGGACGTGTG                                                                           |                                       |
| RverDFG10   | ATCTAGGCCATGTAGTAGCTG                                                                           |                                       |
| FverhisG    | CGATACAGACCGGTTTCAGAC                                                                           |                                       |
| RverhisG    | GCGCTTTCAGTTTCTCCATG                                                                            |                                       |
| TSC13 F1F   | <u>GAGCTC</u> CAGTTGCAAGAGAGATTC                                                                | Restriction site for SacI underlined  |
| TSC13 F1R   | <u>AGATCT</u> TCTTGAAGTACGAGTCC                                                                 | Restriction site for BglII underlined |
| TSC13 F2F   | <u>GGATCC</u> CTTTGTTGATCTTGTGGGT                                                               | Restriction site for BamHI underlined |
| TSC13F2R    | <u>CTGCAG</u> CCAATACCCCAGCTTCAG                                                                | Restriction site for PstI underlined  |
| FverTSC13   | TCCCAATCTGAAGACATGATCGAT                                                                        |                                       |
| RverTSC13   | TGTGTAGACTGGTATATCCCT                                                                           |                                       |
| TSC13MET-F  | TTTGAGGAAATAATCCACAGTTGGTTAGCACA<br>CGAAAAGCAAGATTACAAGTAAAGATCTTTA<br>GTGAGTGAATTGTCTATTCCAAGC |                                       |
| TSC13TMET-R | TCAATTCATTGGAGGAAAAAGATTTAATGGAT<br>CTGGAACGTGATTGACTTCAATGTCAGTCAT<br>AAGTGACAACACTTGGAAGTTGAA |                                       |

Table S3 Primers used for RT qPCR analysis

| Symbol | Name                                                                                                               | Reference sequence | Primers |                           | Efficiency (%) |
|--------|--------------------------------------------------------------------------------------------------------------------|--------------------|---------|---------------------------|----------------|
| DFG10  | <i>Candida albicans</i> SC5314 putative polyprenol reductase                                                       | XM_707500.2        | F       | AACCTCAAAGATGAACGTGAGC    | 2.32           |
|        |                                                                                                                    |                    | R       | CTTAGCCCCAAATAGGTAGCC     |                |
| TSC13  | <i>Candida albicans</i> SC5314 trans-2-enoyl-CoA reductase (NADPH)                                                 | XM_713023.2        | F       | TGTCGTGGTTAGCCTATGCTTT    | 2.23           |
|        |                                                                                                                    |                    | R       | GCCACATTGACCGGAACTAAC     |                |
| HMGR   | <i>Candida albicans</i> SC5314 hydroxymethylglutaryl-CoA reductase (NADPH) (HMG1)                                  | XM_708543.2        | F       | TGAACGTTTCTGTGTCAATGCC    | 2.21           |
|        |                                                                                                                    |                    | R       | GTTGAGCATTTGCACCTGGATT    |                |
| ERG20  | <i>Candida albicans</i> SC5314 bifunctional (2E,6E)-farnesyl diphosphate synthase/dimethylallyltransferase (ERG20) | XM_707824.2        | F       | TCCAGAACAAATTGGGAAAATC GG | 2.35           |
|        |                                                                                                                    |                    | R       | CGTTGTTTCAGGGGTAGCAATCA   |                |
| ACC1   | <i>Candida albicans</i> SC5314 putative acetyl-coenzyme-A carboxylases (ACC1)                                      | XM_713531.1        | F       | AGGTGAAGAGCGTCATGTCATT    |                |
|        |                                                                                                                    |                    | R       | ATGTGGCACCAGCAATTAAACC    |                |
| RER2   | <i>Candida albicans</i> SC5314 ditrans, polycis-polyprenyl diphosphate synthase (RER2)                             | XM_716843.1        | F       | GTTGTGTGAGGAGTATGGAGTT    | 2.32           |
|        |                                                                                                                    |                    | R       | ACACGGCACGAGTATTGTT       |                |
| SRT1   | <i>Candida albicans</i> SC5314 ditrans, polycis-polyprenyl diphosphate synthase (SRT1)                             | XM_019475163.1     | F       | CCCTATACTGCTCGTGATGAAAT   | 2.11           |
|        |                                                                                                                    |                    | R       | ACGATCATGAAGTTCTCCTGAAA   |                |
| NUS1   | <i>Candida albicans</i> SC5314 ditrans, polycis-polyprenyl diphosphate synthase                                    | XM_718081.1        | F       | CACAAGTGATTAGGGAGGACAT T  | 2.25           |
|        |                                                                                                                    |                    | R       | GACCATGCTGTCAACTCACTAA    |                |

|       |                                                                                               |                |   |                             |      |
|-------|-----------------------------------------------------------------------------------------------|----------------|---|-----------------------------|------|
| ACT1  | Candida albicans SC5314<br>actin (ACT1)                                                       | XM_019475182.1 | F | TTGGATTCTGGTGATGGTGTTA      | 2.22 |
|       |                                                                                               |                | R | TCAAGTCTCTACCAGCCAAATC      |      |
| CPA1  | Candida albicans SC5314<br>carbamoyl-phosphate<br>synthase (glutamine-<br>hydrolyzing) (CPA1) | XM_717609.2    | F | GGGAGAATTACGATTGGTGAAG<br>A | 2.25 |
|       |                                                                                               |                | R | GGTGCCTTGGTGGTTACTTTA       |      |
| RPP2b | Candida albicans SC5314<br>ribosomal protein P2B<br>(RPP2B)                                   | XM_718047.1    | F | TG GTAACACCTCTCCATCAGC      | 2.26 |
|       |                                                                                               |                | R | GGATTCTTCGGCTTCAACACC       |      |
| RIP1  | Candida albicans SC5314<br>ubiquinol-cytochrome-c<br>reductase catalytic<br>subunit (RIP1)    | XM_019475318.1 | F | GGTTCTGTCCATGTCACGGT        | 2.25 |
|       |                                                                                               |                | R | GTTCAATGGAGCTGGACCCT        |      |
| LSC2  | Candida albicans SC5314<br>succinate-CoA ligase<br>(GDP-forming) subunit<br>beta (LSC2)       | XM_019475549.1 | F | CACCACTCCAGAAGGTGCTT        | 2.23 |
|       |                                                                                               |                | R | ACCACGACCACCAGTCAAAG        |      |
| PMA1  | Candida albicans SC5314<br>H(+)-exporting P2-type<br>ATPase (PMA1)                            | XM_712666.2    | F | GCTGCCACAGTCAATGAAGC        | 2.20 |
|       |                                                                                               |                | R | GCAATACCAACGGCATCACC        |      |
